# Supplementary material
Source: PubMed Central journal article supplement (PMC2683102)
Supplement: 0808914106_0808914106SI.pdf [file 0808914106_0808914106SI.pdf]

# Supporting Information

Zeng et al. 10.1073/pnas.0808914106

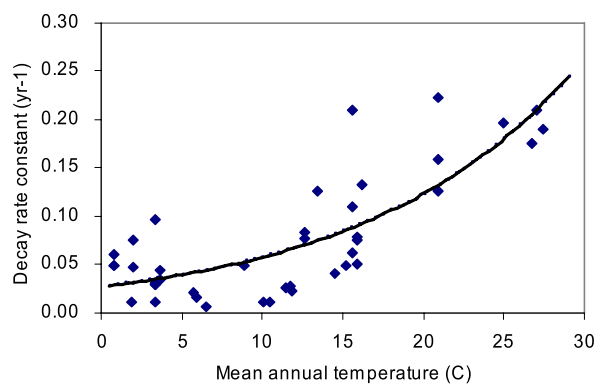

**Fig. S1.** The scatter plot of the decomposition rate constant of CWD and mean annual temperatures for the studies listed in [Table S1](#). The decomposition rate constant could be expressed as an exponential function of mean annual temperature i.e.,  $k = 0.0271e^{0.0758T}$ .

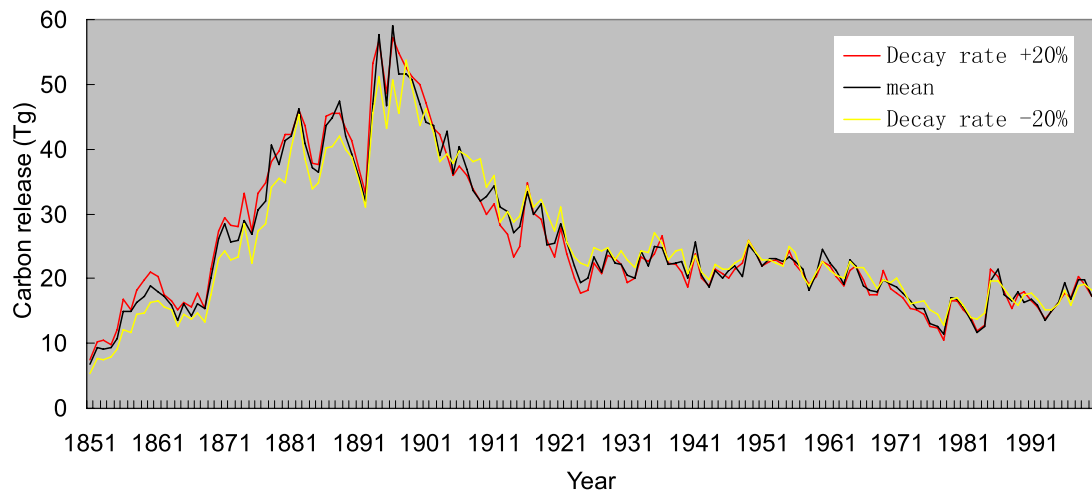

**Fig. S2.** Sensitivity analysis of the carbon release by changing the decay rate  $\pm 20\%$ . The carbon release was not sensitive to the decay rate. This is mainly because the decomposition is a cumulative function. The smaller decomposition rate would make more coarse wood debris available for decomposition at the next year. Thus, the released CO<sub>2</sub> of each year will keep very close in different decay rate.

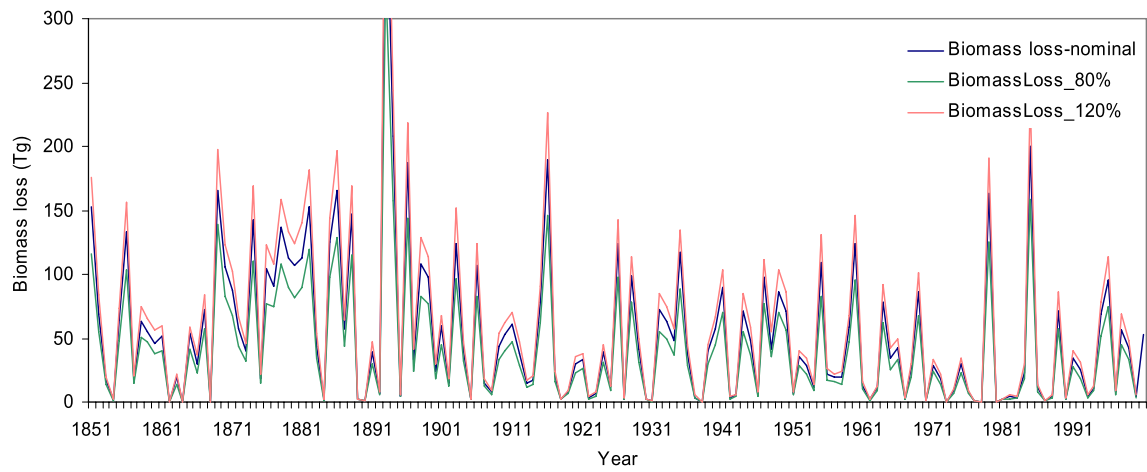

**Fig. S3.** Sensitivity analysis of the biomass loss regarding tree size of the forests. The tree size was changed in terms of the mean values of the biomass distribution  $\pm 20\%$ . The annual biomass loss was sensitive to the changes of tree size because it had approximately  $\pm 20\%$  changes with the  $\pm 20\%$  changes of the mean tree biomass.

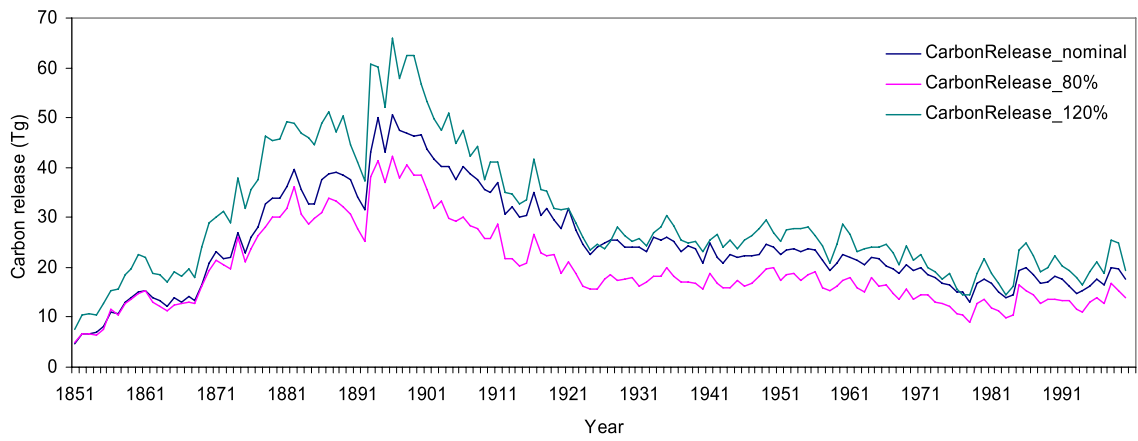

**Fig. S4.** Sensitivity analysis of the carbon loss regarding tree size of the forests. The tree size was changed in terms of the mean values of the biomass distribution  $\pm 20\%$ . The carbon release was sensitive to the changes of the tree size, i.e., it had 15% less carbon released when the mean values of tree biomass was decreased by 20% and 20% increase when the tree biomass increased by 20%.

**Table S1. The decay rate constant of coarse woody debris (CWD) from previous studies**

| Ecosystem             | Location                             | Temp, °C | k      | Source                     |
|-----------------------|--------------------------------------|----------|--------|----------------------------|
| Southern Taiga        | Northwestern Russia, St. Petersburg  | 3.7      | 0.0340 | Krankina and Harmon (1)    |
| Southern Taiga        | Northwestern Russia, St. Petersburg  | 3.7      | 0.0450 | Krankina and Harmon (1)    |
| Temperate coniferous  | Calgary, Canadian Rocky Mountains    | 1.9      | 0.0112 | Johnson and Greene (2)     |
| Temperate coniferous  | Central OR, near LaPine              | 11.4     | 0.0270 | Busse (3)                  |
| Temperate coniferous  | Olympic National Park                | 10.5     | 0.0110 | Graham and Cromack (4)     |
| Temperate coniferous  | Sequoia National Park                | 8.9      | 0.0500 | Harmon et al. (5)          |
| Temperate coniferous  | Pacific Northwest                    | 11.7     | 0.0280 | Sollins (6)                |
| Temperate coniferous  | Cascade Head, OR                     | 10.1     | 0.0118 | Grier (7)                  |
| Temperate coniferous  | H. J. Andrews                        | 6.5      | 0.0063 | Means et al. (8)           |
| Temperate coniferous  | Near Laramie, WY                     | 5.9      | 0.0163 | Fahey (9)                  |
| Temperate coniferous  | NH, Mt. Moosilauke                   | 3.4      | 0.0299 | Lambert et al. (10)        |
| Temperate coniferous  | NH, Mt. Moosilauke                   | 3.4      | 0.0122 | Lambert et al. (10)        |
| Temperate coniferous  | NH, White Mountains                  | 3.4      | 0.0310 | Foster and Lang (11)       |
| Temperate coniferous  | NH, White Mountains                  | 3.4      | 0.0290 | Foster and Lang (11)       |
| Temperate mixed       | Northern WI & MI                     | 5.7      | 0.0210 | Tyrell and Crow (12)       |
| Temperate mixed       | North central MN                     | 2        | 0.0480 | Alban and Pastor (13)      |
| Temperate mixed       | North central MN                     | 2        | 0.0760 | Alban and Pastor (13)      |
| Temperate mixed       | North Carolina, Southern Appalachian | 12.6     | 0.0770 | Mattson et al. (14)        |
| Temperate mixed       | North Carolina, Southern Appalachian | 12.6     | 0.0830 | Mattson et al. (14)        |
| Temperate deciduous   | Hubbard Brook, NH                    | 3.4      | 0.0960 | Arthur et al. (15)         |
| Temperate deciduous   | Lawrence County, IN                  | 11.8     | 0.0236 | MacMillan (16)             |
| Temperate deciduous   | Nashville, TN; Radnor Lake           | 15.6     | 0.2100 | Onega and Eikmeier (17)    |
| Temperate deciduous   | Nashville, TN; Radnor Lake           | 15.6     | 0.1100 | Onega and Eikmeier (17)    |
| Temperate deciduous   | Nashville, TN; Radnor Lake           | 15.6     | 0.0620 | Onega and Eikmeier (17)    |
| Mediterranean         | Southwest Western Australia          | 16.2     | 0.1322 | Brown et al. (18)          |
| Dry tropical          | Yucatan                              | 25       | 0.1972 | Harmon et al. (19)         |
| Wet tropical          | West Malaysia, Pasoh Forest          | 27.4     | 0.1900 | Kira (20)                  |
| Wet tropical          | Barro, CO                            | 20.2     | 0.4610 | Lang and Knight (21)       |
| Wet tropical          | West Sumatra                         | 27       | 0.2100 | Yoneda et al. (22)         |
| Tropical evergreen    | Manaus, Brazil                       | 26.7     | 0.176  | Chambers et al. (23)       |
| Subtropical evergreen | Dinghushan, China                    | 20.9     | 0.2225 | Lv Minghe et al. (24)      |
| Subtropical evergreen | Dinghushan, China                    | 20.9     | 0.1588 | Lv Minghe et al. (24)      |
| Subtropical evergreen | Dinghushan, China                    | 20.9     | 0.1257 | Lv Minghe et al. (24)      |
| Temperate conifer     | ACT Canberra, Australia              | 13.4     | 0.1270 | Mackensen & Bauhus (25)    |
| Temperate deciduous   | Central Highlands, Australia         | 14.5     | 0.0410 | Mackensen & Bauhus (25)    |
| Temperate deciduous   | South coast, Australia               | 15.2     | 0.0490 | Mackensen & Bauhus (25)    |
| Boreal conifer        | Thompson, Manitoba, Canada           | 0.8      | 0.0600 | Bond-Lamberty & Gower (26) |
| Boreal conifer        | Thompson, Manitoba, Canada           | 0.8      | 0.0500 | Bond-Lamberty & Gower (26) |
| Boreal conifer        | Thompson, Manitoba, Canada           | 0.8      | 0.0500 | Bond-Lamberty & Gower (26) |
| Pine plantation       | Pickens & Anderson, SC               | 15.88    | 0.0510 | Barber & Van-Lear (27)     |
| Pine plantation       | Pickens & Anderson, SC               | 15.88    | 0.0790 | Barber & Van-Lear (27)     |
| Pine plantation       | Pickens & Anderson, SC               | 15.88    | 0.0750 | Barber & Van-Lear (27)     |

1. Krankina ON, Harmon ME (1995) Dynamics of the dead wood carbon pool in northwestern Russian boreal forests. *Water Air Soil Pollut* 82:227–238.
2. Johnson EA, Greene DF (1991) A method for studying dead bole dynamics in *Pinus contorta* var. *latifolia*-*Picea engelmannii* forests. *J Veg Sci* 2:523–530.
3. Busse MD (1994) Downed bole-wood decomposition in lodgepole pine forests of central Oregon. *Soil Sci Soc Am J* 58:221–227.
4. Graham RL, Cromack K (1982) Mass, nutrient content, and decay rate of dead boles in rain forests of Olympic National Park. *Can J For Res* 12:511–520.
5. Harmon ME, Cromack K, Smith BG (1987) Coarse woody debris in mixed-conifer forests, Sequoia National Park, California. *Can J For Res* 17:1265–1272.
6. Sollins P (1981) Input and decay of coarse woody debris in coniferous stands in western Oregon and Washington. *Can J For Res* 12:18–28.
7. Grier CC (1978) A *Tsuga heterophylla*-*Picea sitchensis* ecosystem of coastal Oregon: Decomposition and nutrient balance of fallen logs. *Can J For Res* 8:198–206.
8. Means JE, Cromack K, MacMillan PC (1985) Comparison of decomposition models using wood density of Douglas-fir logs. *Can J For Res* 15:1092–1098.
9. Fahey TJ (1983) Nutrient dynamics of aboveground detritus in southeastern Wyoming. *Ecol Monogr* 53:51–72.
10. Lambert RL, Lang GE, Reiners WA (1980) Loss of mass and chemical change in decaying boles of a subalpine balsam fir forest. *Ecology* 61:1460–1473.
11. Foster JR, Lang GE (1982) Decomposition of red spruce and balsam fir boles in the White Mountains of New Hampshire. *Can J For Res* 12:617–626.
12. Tyrell LE, Crow TR (1994) Dynamics of dead wood in old-growth hemlock-hardwood forests of northern Wisconsin and northern Michigan. *Can J For Res* 24:1672–1683.
13. Alban DH, Pastor J (1993) Decomposition of aspen, spruce, and pine boles on two sites in Minnesota. *Can J For Res* 23:1744–1749.
14. Mattson KG, Swank WT, Waide JB (1987) Decomposition of woody debris in a regenerating, clear-cut forest in the southern Appalachians. *Can J For Res* 17:712–721.
15. Arthur MA, Tritton LM, Fahey TJ (1992) Dead bole mass and nutrients remaining 23 years after clear-felling of a northern hardwood forest. *Can J For Res* 22:1298–1305.
16. MacMillan PC (1988) Decomposition of coarse woody debris in an old-growth Indiana forest. *Can J For Res* 18:1353–1362.
17. Onega TI, Eikmeier WG (1991) Woody detritus inputs and decomposition kinetics in a southern temperate deciduous forest. *Bull Torr Bot Club* 118:52–57.
18. Brown S, Mo J, McPherson JK, Bell DT (1996) Decomposition of woody debris in western Australian forests. *Can J For Res* 26:954–966.
19. Harmon, ME, Whigham DF, Sexton J, Olmsted I (1995) Decomposition and mass of dead wood in the dry tropical forests of the northeastern Yucatan Peninsula, Mexico. *Biotropica* 27:305–316.
20. Kira T (1976) Community architecture and organic matter dynamics in tropical lowland rain forests in southeast Asia with special reference to Pasoh Forest, West Malaysia. In *Community Architecture and Organic Matter Dynamics in Tropical Lowland Rain Forests in Southeast Asia with Special Reference to Pasoh Forest, West Malaysia*, eds Tomlinson PB, Zimmermann MH (Cambridge Univ Press, Cambridge, UK), pp 561–590.
21. Lang GE, Knight DH (1979) Decay rates for boles of tropical trees in Panama. *Biotropica* 11:316–317.
22. Yoneda T, Tamin R, Ogino K (1990) Dynamics of aboveground big woody organs in a foothill dipterocarp forest, West Sumatra, Indonesia. *Ecol Res* 5:111–130.
23. Chambers JQ, et al. (2000) Decomposition and carbon cycling of dead trees in tropical forests of the central Amazon. *Oecologia* 122:380–388.
24. Lv MH, Zhou GY, Zhang DQ, Guan LL (2006) Decomposition and nutrient release from coarse woody debris of *Castanopsis chinensis* in Dinghushan forest ecosystem. *J Trop Subtrop Bot* 14:107–113.
25. Mackensen J, Bauhus J (2003) Density loss and respiration rates of coarse woody debris of *Pinus radiata*, *Eucalyptus regnans* and *Eucalyptus maculata*. *Soil Bio Biochem* 35:177–186.
26. Bond-Lamberty B, Gower ST (2008) Decomposition and fragmentation of coarse woody debris: Re-visiting a boreal black spruce chronosequence. *Ecosystems* 11:831–840.
27. Barber BL, Van-Lear DH (1984) Weight loss and nutrient dynamics in decomposition woody Loblolly pine logging slash. *Soil Sci Soc Am J* 48:906–910.

**Table S2. The correlation between the annual forest damages and annual tropical cyclones**

| Period                   | 1851–1900     | 1901–1950      | 1951–2000   | 1871–2000*     |
|--------------------------|---------------|----------------|-------------|----------------|
| No. of tropical cyclones | 0.39 (0.005)  | 0.49 (0.0003)  | 0.29 (0.04) | 0.26 (0.0024)  |
| No. of hurricanes        | 0.47 (0.0005) | 0.67 (<0.0001) | 0.31 (0.03) | 0.42 (<0.0001) |

The forest impacts (number of damaged trees) and the biomass loss had the same correlation and *P* values (in parentheses).  
 \*The correlation was calculated for the period 1871–2000.
